# Supplementary material
Source: Springer Nature journal article supplement (https://www.springermedizin.de/resource/supplementary/12905_2009_199_MOESM5_ESM.pdf/9518160)

Figure 5 - Grandma's treats

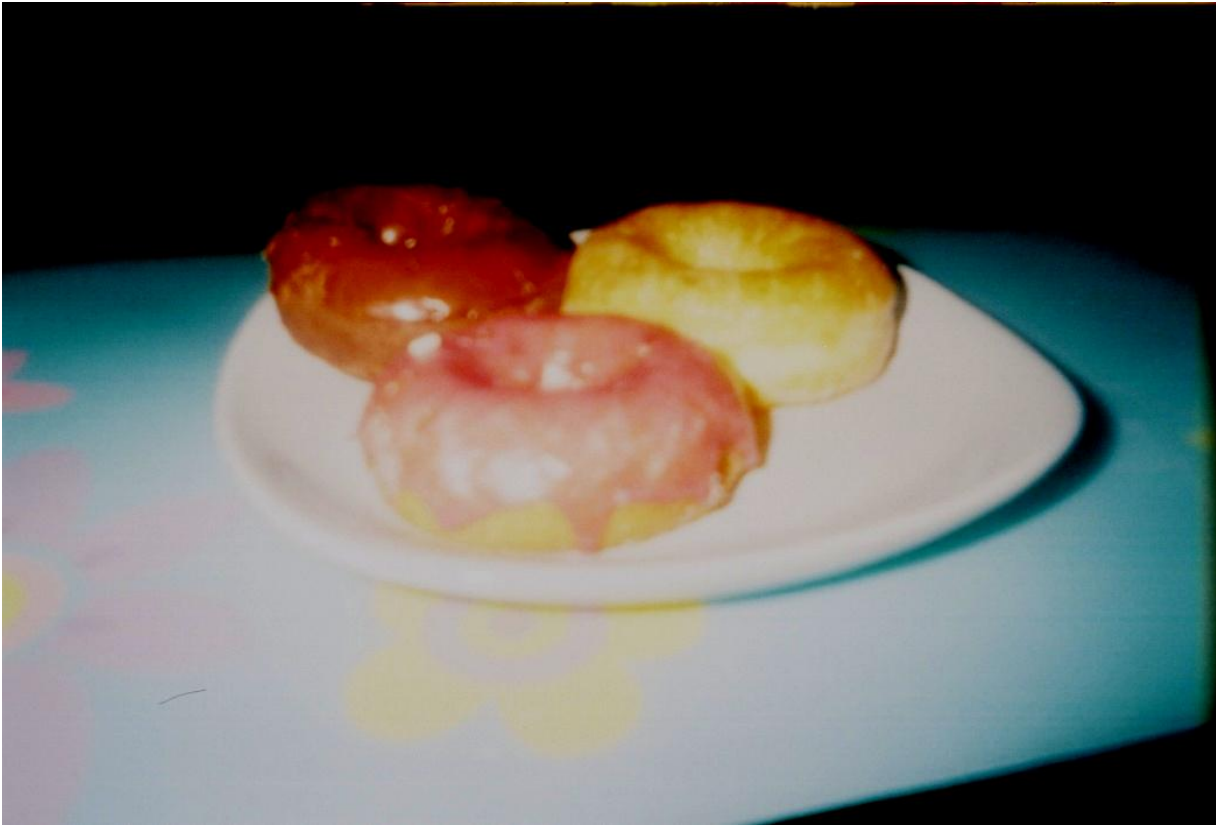

Supplement: MOESM5 [file 9518160]
